# Supplementary material
Source: publisher site journal article supplement (https://www.spandidos-publications.com/5111/downloadSupplementary)
Supplement: Supplementary file 1 [file downloadSupplementary]

## Sheet: Table S14
Table SXIV. The correlation of DNase expression and the ESTIMATES score in different cancer types.
Cancer type	DNASE1	DNASE1L1	DNASE1L2	DNASE1L3	DNASE2	DNASE2B
ACC	-0.279844	-0.0940604	-0.614679	0.399611	-0.00981013	0.0633374
BLCA	-0.321921	0.0526085	-0.314937	0.514604	0.161576	0.0846771
BRCA	-0.137819	0.0836475	-0.184734	0.527509	-0.00458797	0.232069
CESC	-0.131152	0.0215754	-0.177411	0.321241	0.161469	0.279214
CHOL	-0.131789	0.11583	-0.0718147	0.353668	0.047619	0.384066
COAD	-0.185647	-0.0600846	-0.135663	0.219763	0.259556	0.0482362
DLBC	-0.214394	0.297981	-0.53756	0.229917	0.595745	0.420055
ESCA	-0.0199348	-0.0620991	-0.0594233	0.061193	0.174589	0.208906
GBM	-0.473439	0.617042	-0.319853	0.213397	0.599055	0.0429994
HNSC	-0.139392	0.0793687	-0.0608202	0.248331	0.127402	0.438361
KICH	-0.00979021	-0.293094	-0.326748	0.383479	-0.0951923	0.322523
KIRC	-0.128178	0.0383507	-0.167781	0.0800147	0.303003	0.408755
KIRP	-0.356146	0.0901255	-0.276788	0.395817	0.576132	0.564329
LAML	-0.125643	0.457093	-0.138383	0.31592	0.122363	-0.113557
LGG	-0.302119	0.438017	-0.263729	0.126647	0.607283	0.434029
LIHC	-0.0274241	0.117833	-0.208242	0.230743	0.0587419	0.348244
LUAD	-0.170804	0.116967	-0.0574986	0.362656	0.394499	0.478842
LUSC	-0.197876	0.205343	-0.12123	0.0720574	0.124833	0.472399
MESO	-0.40701	0.0327657	-0.00961366	0.51264	0.00999104	0.423435
OV	-0.196584	0.272918	-0.078231	0.439237	0.038328	0.286245
PAAD	-0.27532	-0.209617	-0.464834	0.481395	0.201331	0.372645
PCPG	-0.43697	-0.165493	-0.174134	0.405466	-0.040874	0.279984
PRAD	-0.217207	-0.176463	-0.0586854	0.658626	0.264857	-0.262475
READ	-0.210037	0.282128	-0.0243463	0.211652	0.260714	0.0106509
SARC	-0.516761	0.188226	-0.212173	0.403064	0.348384	0.23492
SKCM	-0.112167	0.0629297	-0.0966148	0.593685	0.281647	0.122826
STAD	-0.166699	0.0422157	-0.267451	0.361849	0.316002	0.321258
TGCT	0.132348	0.435027	-0.175234	0.547818	0.772414	0.587902
THCA	-0.142098	-0.19244	-0.160902	-0.155821	-0.329755	0.381597
THYM	-0.109764	-0.0105683	0.117063	0.39775	0.039154	-0.0130678
UCEC	-0.0829033	0.0188731	-0.0111317	0.564219	-0.0168671	0.228551
UCS	-0.338346	0.179426	-0.204511	0.39542	0.246685	0.202619
UVM	-0.218847	0.144843	0.0525329	0.682841	0.52255	0.499584
